# Supplementary material
Source: Springer Nature journal article supplement (https://www.springermedizin.de/resource/supplementary/12958_2011_854_MOESM7_ESM.pdf/9569002)

# Immunostaining- Flotillin-1 (*FLOT1*)

Human endometrium biopsies

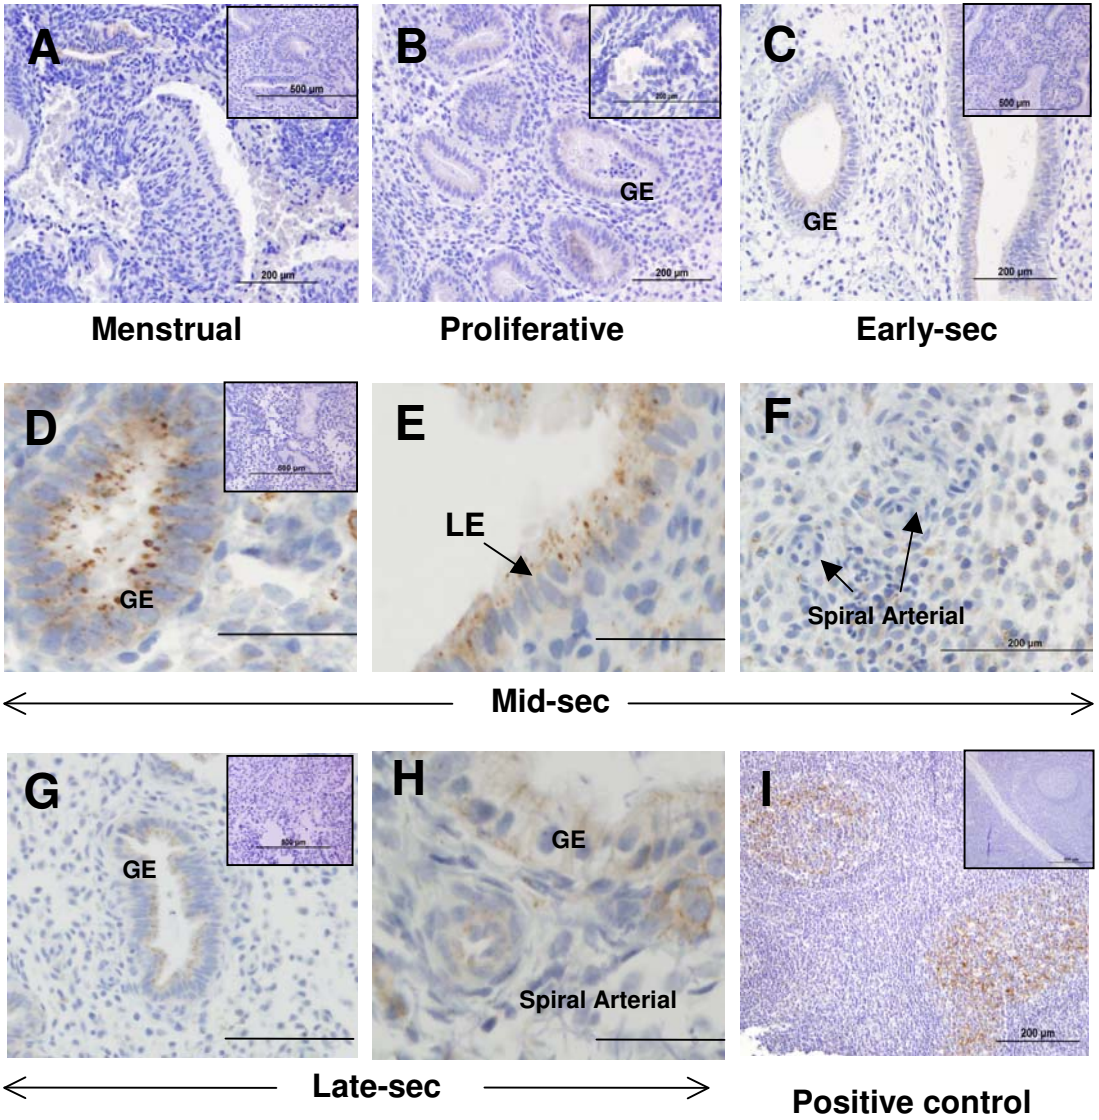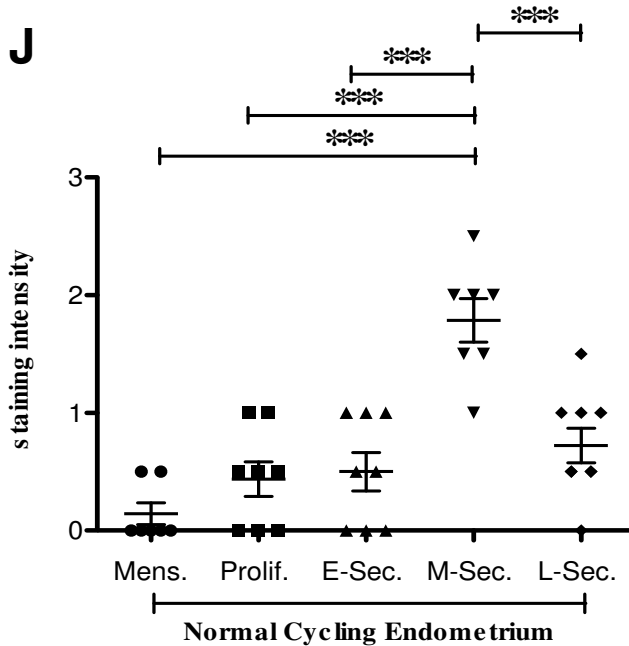

Supplement: MOESM7 [file 9569002]
